# Supplementary material for: Stakeholder engagement in gender and climate change policy processes: Lessons from the climate change, agriculture and food security research program
Source: Frontiers journal article supplement (doi:10.3389/fsufs.2022.862654), 2022-11-28
Supplement: Table_1.docx [file Table_1.docx]

Supplementary material

Table S1. Additional details of the projects included in the study

| **Project name**  **(Short form of name)** | **Project lead** | **Country** | **Type and purpose of engagement** | **Methods** |
| --- | --- | --- | --- | --- |
| Engagement, synthesis and support in gender  (Gender and Social Inclusion - GSI project) | CCAFS GSI team | Burundi, Djibouti, Eritrea, Ethiopia, Kenya, Nigeria, South Sudan, Sudan, Tanzania, Rwanda, and Uganda; Papua New Guinea | Promote gender-inclusive climate policymaking, negotiations, and practices to reduce gender-based vulnerabilities and improve resiliency for both men and women across Africa; gender capacity development of decision makers and climate policy negotiators; gender inputs to climate policy | Webinars, meetings, trainings/ workshops, and communication through social media channels |
| Regional and national engagement, synthesis and strategic research for East Africa (EA)  (CCAFS EA regional project) | CCAFS East Africa regional team | Kenya, Ethiopia, Uganda, Tanzania | Using scientific evidence to influence climate change policy at national, regional and international levels, gender capacity development of decision makers and climate policy negotiators | Workshops, meetings, write-shops, webinars, conferences |
| Policy action for climate change adaptation  (PACCA) | IITA | Uganda and Tanzania | Gender analysis of agri-food and climate policies and budgets to inform the Policy Action for Climate Change Adaption, climate scenario analysis to inform policy | Desk reviews, workshops, validation meetings, multi-stakeholder platforms at district and national levels, info-notes, interviews |
| Regional/national synthesis, engagement and support in West Africa (WA)  (CCAFS WA regional project) | CCAFS West Africa regional team | Ghana | Developing a gender, climate and agriculture profile of Ghana | Science-policy dialogue platforms (national and district) |
| Shaping equitable climate change policies for resilient food systems across Central America and the Caribbean (CAC)  (Shaping CAC Policies) | Alliance of Bioversity and CIAT and CCAFS Latin America team | Colombia, Costa Rica, El Salvador, Guatemala, Honduras, Nicaragua, and Peru | Generating evidence of gender-responsive climate-smart agriculture and policies, desk-based gender analysis of climate and agri-food policies, Scenario-based analysis for policy formulation | Workshops, training, webinars, meetings, emails, policy briefs, newsletters |
| Scaling-up strategies for climate risk management in South Asian (SA) agriculture  (CCAFS SA regional project) | CCAFS South Asia regional team | Nepal | Agriculture and climate change policy reviews for gender analysis, enhancing awareness and capacity of women leaders and policymakers on gender, agriculture, and climate change | Traveling seminars |
| A Climate Services Menu (CliSM) for Southeast Asia  (CliSM) | Alliance of Bioversity and CIAT and ICRAF | Vietnam,  Laos and Cambodia | Develop Agro-climate Information Services (ACIS) for women and ethnic minority farmers and adaption planning | Participatory scenario planning workshops, interviews and focus group discussions, conferences, policy briefs, websites of influential institutions |
